# Supplementary material for: Study on the Physical, Thermal and Mechanical Properties of SEBS/PP (Styrene-Ethylene-Butylene-Styrene/Polypropylene) Blend as a Medical Fluid Bag
Source: MDPI journal article supplement (doi:10.3390/polym14163267), 2022-08-11
Supplement: s1 [file s1]

## Supplementary data

**Table S1:** Mass of the SEBS/PP 50/50 specimens before and after immersion in distilled water

| SEBS/PP 50/50 | Mass of specimen before immersion (g) | Mass of specimen after immersion (g) | Water absorption (%) |
|---------------|---------------------------------------|--------------------------------------|----------------------|
| Specimen 1    | 0.26                                  | 0.26                                 | 0                    |
| Specimen 2    | 0.3                                   | 0.3                                  | 0                    |
| Specimen 3    | 0.3                                   | 0.3                                  | 0                    |
| Specimen 4    | 0.28                                  | 0.28                                 | 0                    |
| Specimen 5    | 0.25                                  | 0.25                                 | 0                    |

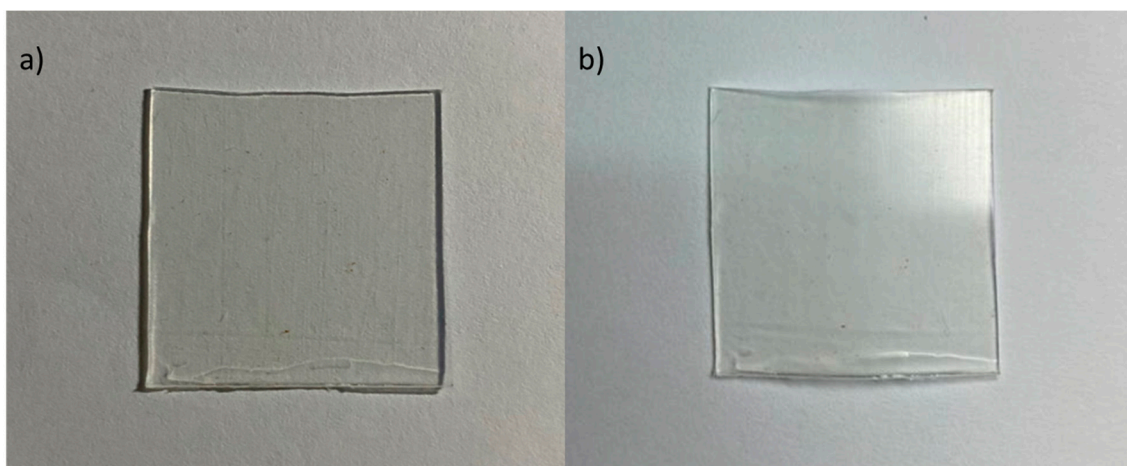

**Figure S1:** Figure of the SEBS/PP 50/50 specimen (a) before steam sterilisation and (b) after steam sterilisation.
